1 April 25, 2021 KB

2 **Fixation and effective size in a haploid-diploid population with asexual reproduction**

3

4 **\*Kazuhiro Bessho, \*\*Sarah P. Otto**

5 \* *Saitama Medical University, 38 Morohongo Moroyama-machi, Iruma-gun, Saitama 350-0495,*

6 *Japan*

7 \*\**Department of Zoology, The University of British Columbia, Vancouver, BC, V6T 1Z4,*

8 *Canada*

9 \* *besshokazuhiro.reserch@gmail.com; (+81) 049-276-2030*

10 \*\* *otto@zoology.ubc.ca; (+1) 604-822-2778*

11

12 \*Corresponding author

13 *besshokazuhiro.reserch@gmail.com (KB)*

14 \*Co-corresponding author

15 *otto@zoology.ubc.ca (SPO)*

16

17 **Keywords:** haploid-diploid life cycle, Wright-Fisher model, fixation probability, variance

18 effective population size, class reproductive value

19

20

21

22

23

24

25 **Abstract**

26           The majority of population genetic theory assumes fully haploid or diploid organisms  
27 with obligate sexuality, despite complex life cycles with alternating generations being commonly  
28 observed. To reveal how natural selection and genetic drift shape the evolution of haploid-diploid  
29 populations, we analyze a stochastic genetic model for populations that consist of a mixture of  
30 haploid and diploid individuals, allowing for asexual reproduction and niche separation between  
31 haploid and diploid stages. Applying a diffusion approximation, we derive the fixation  
32 probability and describe its dependence on the reproductive values of haploid and diploid stages,  
33 which depend strongly on the extent of asexual reproduction in each phase and on the ecological  
34 differences between them.

35

## 36 **1. Introduction**

37           Sexual reproduction in eukaryotes generally consists of an alternation of generations,  
38 where meiosis halves the number of chromosomes to produce haploids and syngamy brings  
39 together haploid gametes to produce diploids. The extent of development in each ploidy phase  
40 varies substantially (Bell 1982; 1994). In diplontic organisms, at one extreme, development and  
41 growth occur only in the diploid phase, as is observed in most animals. Haplontic organisms, at  
42 the other extreme, undergo mitotic growth only in the haploid stage, as is seen in some green  
43 algae. In between these extremes, many terrestrial plants, macroalgae, and fungi exhibit both  
44 haploid and diploid growth (haploid-diploid life cycles). These stages are typically free living in  
45 macroalgae, with either macroscopically similar (isomorphic) or distinct (heteromorphic) forms  
46 in the haploid and diploid stage (Raper and Flexer 1970; Wilson 1981; Mable and Otto 1998;  
47 Coelho 2007).

48           To explain variation in life cycles, several theoretical models have analyzed the  
49 deterministic dynamics of a modifier allele that alters the time spent in haploid and diploid  
50 phases (e.g., Perrot et al. 1991; Otto and Goldstein 1992; Goldstein 1992; Otto 1994; Orr and  
51 Otto 1994; Jenkins and Kirkpatrick 1995; Otto and Marks 1996; Scott and Rescan 2017).  
52 However, there are some gaps between these models and the complexities seen in many  
53 haploid-diploid species. For example, these models often treat haploid and diploid individuals as  
54 ecologically equivalent, despite the frequent observation of niche differences and seasonal shifts  
55 in prevalence (e.g., Slocum 1980; Dethier 1981). Most of these models also assume obligate  
56 sexuality (but see Otto and Marks 1996), despite asexuality being frequently observed among  
57 haploid-diploid species (“asexual looping”). Furthermore, while several models have explored  
58 how haploid-diploid life cycles might evolve, the impact of haploid-diploid life cycles on

59 evolutionary processes remains underexplored (see, e.g., Bessho and Otto 2017 on the impact on  
60 fixation probabilities and Immler et al. 2012 on the maintenance of variation).

61 Here we contribute to evolutionary theory for haploid-diploid populations by  
62 calculating the fixation probability of mutations using a stochastic genetic model. This builds  
63 upon our previous work (Bessho and Otto 2017) by accounting for asexual looping and niche  
64 differences between ploidy phases, both of which are common in macroalgae (Bell 1982; de  
65 Wreede and Klinger 1988; Hawkes 1990). Haploid and diploid phases often differ  
66 physiologically, and even isomorphic haploids and diploids may differ ecologically (Hannach  
67 and Santelices 1985; Destombe et al. 1993; Dyck and de Wreede 2006; Thornber et al., 2006;  
68 Vieira et al. 2018). We therefore explore different forms of density dependence, acting either  
69 globally on the total population size (as in Bessho and Otto 2017) or locally on the population  
70 size of haploids and diploids separately (Figure 1). We show that the fate of a mutation depends  
71 strongly on the reproductive values of haploids and diploids, which in turn depend on the extent  
72 of asexual reproduction and ecological differences between the phases.

73

## 74 **2. Model**

75 In Bessho and Otto (2017), we calculated the fixation probabilities by tracking the  
76 dynamics of a resident allele ( $R$ ) and a mutant allele ( $M$ ) in haploid and diploid individuals, using  
77 both a Wright-Fisher and a Moran model. In that model, reproduction was obligately sexual,  
78 individuals were ecologically equivalent, and the total population size was held constant (global  
79 density dependence). Below, we calculate the fixation probability by first considering asexual  
80 reproduction in each phase, assuming that haploids and diploids are ecologically equivalent  
81 (global population regulation), and then determine how these results are affected by niche  
82 differences (local population regulation that is ploidy specific).

83

## 84 2.1. Haploid-diploid Wright-Fisher model with global regulation and asexual looping

85 Let  $X_{(GT)}(t)$  be a random variable that represents the number of individuals with  
86 “genotype” ( $GT$ ) at time  $t$  with resident ( $R$ ) and mutant alleles ( $M$ ), and let  $x_{(GT)}(t)$  represent a  
87 particular outcome of this random variable. In the global regulation model, we assume a constant  
88 population,  $x_R + x_M + x_{RR} + x_{RM} + x_{MM} = N_{tot}$ , that is strictly regulated regardless of the  
89 ploidy of the individuals.

90 The reproductive output and the degree of asexuality are characterized by  $w_{(GT)}$  and  
91  $a_H$  for haploids [ $(GT) = R$  or  $M$ ] and  $w_{(GT)}$  and  $a_D$  for diploids [ $(GT) = RR, RM, \text{ and } MM$ ].  
92 Specifically, diploid individuals produce  $(1 - a_D)w_{(GT)}$  haploid spores (sexual reproduction)  
93 and  $a_D w_{(GT)}$  diploid offspring (asexual loop). Similarly, haploids produce  $(1 - a_H)w_{(GT)}/2$   
94 female gametes (sexual reproduction) and  $a_H w_{(GT)}$  haploid offspring (asexual loop), where we  
95 assume that the species is monoecious and invests equal resources in male and female gametes.  
96 During syngamy, we assume that male gametes are not limiting, that mating is random, and that  
97 female gametes are successfully fertilized with male gametes, at a rate  $f_{(GT)}$  [ $(GT) = R$  or  $M$ ],  
98 becoming diploid zygotes. For clarity, we describe the model with non-overlapping generations,  
99 although we note that overlapping generations can be considered by including surviving adults in  
100 the counts of asexual offspring ( $a_D w_{(GT)}$  and  $a_H w_{(GT)}$ ).

101 We define the selection coefficient ( $s_{(GT)}$ ) and the degree of dominance ( $h$ ) acting upon  
102 the mutant allele such that:  $f_M = f_R(1 - s_M^f)$ ,  $w_M = w_R(1 - s_M^w)$ ,  $w_{RM} = w_{RR}(1 - s_{RM}^w)$ ,  
103  $w_{MM} = w_{RR}(1 - s_{MM}^w)$ , and  $h = s_{RM}^w/s_{MM}^w$ . To perform the diffusion approximation, we assume  
104 that selection is weak,  $s_M^f = \epsilon \tilde{s}_M^f$  and  $s_{(GT)}^w = \epsilon \tilde{s}_{(GT)}^w$ , where  $\epsilon$  is a small parameter.

105

## 106 2.2. Haploid-diploid Wright-Fisher model with local regulation and asexual looping

107 We then consider the case where density dependence regulates haploid and diploid  
108 populations separately, which may occur if they have different resource needs or utilize different  
109 habitats or microhabitats (for short-hand, we refer to this case as “local regulation”). More  
110 specifically, we assume that the population size of haploids and diploids is separately regulated  
111 and remains constant  $N_H$  and  $N_D$  ( $x_R + x_M = N_H$  and  $x_{RR} + x_{RM} + x_{MM} = N_D$ ), respectively.  
112 We set  $N_H + N_D = N_{tot}$ ,  $\hat{p}_H^I = N_H/N_{tot}$ , and  $\hat{p}_D^I = N_D/N_{tot}$ , which will then allow us to  
113 compare the results of local and global regulation. Holding population sizes constant is assumed  
114 strictly for mathematical convenience but may be reasonable for populations whose sizes are  
115 strongly regulated by the availability of appropriate habitat.

116

### 117 **3. Fixation probability in a haploid-diploid population**

#### 118 3.1. Fixation probability in the global regulation model

119 The fixation probability in a haploid-diploid population can be derived using a  
120 diffusion approximation (Bessho and Otto 2017), but doing so requires that we approximate the  
121 dynamics to reduce the dimensionality from four variables ( $x_R, x_M, x_{RR}, x_{RM}, x_{MM}$ , which sum to  
122  $N_{tot}$ ) down to one. We do so by using a separation of time scales, deriving the first and second  
123 moments of the mutant allele frequency. Specifically, we transform the number of individuals of  
124 each genotype,  $x_{(GT)}$ , into new variables that allow us to separate the slower evolutionary  
125 dynamics and the faster ecological dynamics (Appendix A):

$$p_{ave} = c_H p_H + c_D p_D, \quad (1a)$$

$$\delta_p = p_D - p_H, \quad (1b)$$

$$\eta_{HW} = 1 - \frac{1}{2p_D(1-p_D)} \frac{x_{RM}}{x_{RR} + x_{RM} + x_{MM}}, \quad (1c)$$

$$\rho_H = \frac{x_R + x_M}{N_{tot}}, \quad (1d)$$

126 where  $p_{ave}$  indicates the average allele frequency of haploids and diploids weighted by the class  
 127 reproductive values ( $c_H$  and  $c_D$ , where  $c_H + c_D = 1$ , see next paragraph),  $\delta_p$  indicates the  
 128 difference in allele frequencies between haploids and diploids,  $\eta_{HW}$  indicates the departure from  
 129 the Hardy-Weinberg equilibrium in diploids, and  $\rho_H$  indicates the frequency of haploids in the  
 130 population. Within these equations, the frequencies of mutant alleles in haploids and diploids are  
 131  $p_H = x_M/(x_R + x_M)$  and  $p_D = \left(\frac{x_{RM}}{2} + x_{MM}\right)/(x_{RR} + x_{RM} + x_{MM})$ . As similar variables are  
 132 used in the model with local population regulation, we use superscripts to indicate the form of  
 133 population regulation (“*Model*” is  $G$  for global or  $L$  for local regulation).

134 The class reproductive values of haploids and diploids are defined as follows. In linear  
 135 models, “reproductive value” is a measure of the expected fraction of the population in the  
 136 long-term future that descends from an individual of a particular type (e.g., age or stage class).  
 137 Class reproductive values, as defined by Taylor (1990) and Rousset (2004, p.153), scale these  
 138 individual reproductive values up to the whole population of each class (i.e., the product of the  
 139 individual reproductive values times the class size). In the models considered here, the dynamics  
 140 are non-linear because of competition for resources ( $N_{tot}$ ). Nevertheless, we can approximate  
 141 reproductive values by assuming that the population is near equilibrium with only resident alleles  
 142 and by holding the strength of competition constant (see Supplementary *Mathematica* file for all  
 143 calculations). Doing so, we find that the class reproductive values of haploids and diploids,  
 144 expressed as proportions that sum to one, are:

$$c_H^G = \frac{(1 - a_H) \frac{f_R}{2} w_R (\hat{\rho}_H^G)^2}{(1 - a_H) \frac{f_R}{2} w_R (\hat{\rho}_H^G)^2 + (1 - a_D) w_{RR} (\hat{\rho}_D^G)^2}, \quad (2a)$$

$$c_D^G = \frac{(1 - a_D)w_{RR}(\hat{\rho}_D^G)^2}{(1 - a_H)\frac{f_R}{2}w_R(\hat{\rho}_H^G)^2 + (1 - a_D)w_{RR}(\hat{\rho}_D^G)^2} \quad (2b)$$

145 where  $\hat{\rho}_H^G = 1 - \hat{\rho}_D^G$  is the equilibrium frequency of haploids in the global model (Eq. A.4). As  
 146 a special case of interest, when populations are purely sexual ( $a_H = a_D = 0$ ), we can plug the  
 147 equilibrium for  $\hat{\rho}_H^G$  from Eq. (A.4) into (2) and show that  $c_H^G = c_D^G = 1/2$ .

148 As discussed in Appendix A (see also Bessho and Otto 2017), equations (2) provide the  
 149 only weights that allow ecological and evolutionary time scales to be separated when calculating  
 150 the average allele frequency in equation (1a), which is why we take that to be the evolutionarily  
 151 relevant average. Although one might initially think that diploids should count twice as much  
 152 because they contain two allele copies and that the evolutionarily relevant average allele  
 153 frequency would depend on the population sizes of haploids and diploids, a strict alternation of  
 154 generations ( $a_H = a_D = 0$ ) ensures that haploids and diploids contribute equally to long-term  
 155 future generations, so that their reproductive values are equal and the evolutionarily relevant  
 156 average allele frequency is  $p_{ave} = (1/2)p_H + (1/2)p_D$  (Bessho and Otto 2017).

157 As with our previous model, we can track the slow evolutionary dynamics for the  
 158 expected change in average allele frequency  $p_{ave}$  under weak selection, once the fast ecological  
 159 dynamics have stabilized, as which point we can show that there are similar allele frequencies in  
 160 haploids and diploids ( $\delta_p \approx 0$ ), diploids are approximately at Hardy-Weinberg equilibrium  
 161 ( $\eta_{HW} \approx 0$ ), and the ratio of haploids is similar among mutant and resident genotypes ( $\rho_H \approx \hat{\rho}_H^G$ )  
 162 (Appendix A, File S1). Furthermore, to leading order, the second moment of change in allele  
 163 frequency is equal to the neutral case and can be derived in the diffusion limit ( $N_{tot} \rightarrow \infty$ ).

164 Given a single variable,  $p_{ave}$ , changing slowly over evolutionary time, we can then  
 165 use standard diffusion methods to calculate the fixation probability of a mutation in a  
 166 haploid-diploid population,  $u(p_0^{Model})$ , where “Model” is *G* for global and *L* for local (considered



167 in the next section). The diffusion is a function of the first and second moments of change in the  
 168 mutant allele frequency,  $m^{Model}(p_{ave})$  and  $v^{Model}(p_{ave})$ , both measured in time units of  $N_{tot}$   
 169 generations:

$$u(p_0^{Model}) = \frac{\int_0^{p_0^{Model}} \exp[-2Q^{Model}(p')] dp'}{\int_0^1 \exp[-2Q^{Model}(p')] dp'}, \quad (3a)$$

$$m^{Model}(p_{ave}) = \frac{N_{tot} p_{ave} (1 - p_{ave})}{2} [2s_{ave}^{Model} + 2c_D^{Model} p_{ave} (1 - 2h) s_{MM}^w], \quad (3b)$$

$$v^{Model}(p_{ave}) = \frac{p_{ave} (1 - p_{ave}) [(c_D^{Model})^2 \hat{\rho}_H^{Model} + (c_H^{Model})^2 (2\hat{\rho}_D^{Model})]}{\hat{\rho}_H^{Model} (2\hat{\rho}_D^{Model})}, \quad (3c)$$

170 where  $p_0^{Model}$  is the initial allele frequency of mutants (we focus on the case with a single initial  
 171 mutant allele,  $p_0^{Model} = 1/[N_{tot} (\hat{\rho}_H^{Model} + 2\hat{\rho}_D^{Model})]$ ) and  
 172  $Q^{Model}(p) = \int (m^{Model}(p)/v^{Model}(p)) dp$ . For the global regulation model, the average  
 173 selection acting upon rare mutant alleles across haploid and diploid stages,  $s_{ave}^G$ , can be  
 174 calculated from the first moment equation (Appendix 1) and equals:

$$s_{ave}^{Model} = c_H^{Model} s_M^w + c_D^{Model} s_{RM}^w + \phi^{Model} c_D^{Model} \frac{s_M^f}{2}, \quad (4a)$$

$$\phi^{Model} = \frac{(1 - a_H) \tilde{w}_R \hat{\rho}_H^{Model}}{(1 - a_H) \tilde{w}_R \hat{\rho}_H^{Model} + a_D w_{RR} \hat{\rho}_D^{Model}}, \quad (4b)$$

175 where  $\tilde{w}_R = f_R w_R / 2$  is the fitness of haploids considering the cost of sex. As we will see later,  
 176 this equation is valid for local regulation model. The term  $\phi^{Model}$  indicates the fraction of the  
 177 diploids in the next generation that come from the union of gametes rather than diploid asexual  
 178 reproduction. With obligately sexual haploid-diploids ( $a_H = a_D = 0$ , where  $c_H^{Model} = c_D^{Model} =$   
 179  $1/2$  and  $\phi^{Model} = 1$ ), these results coincide with those of Bessho and Otto (2017).

180

### 181 3.2. Fixation probability in the local regulation model

182 We next derive the fixation probability in a haploid-diploid population when density

183 dependence regulates haploid and diploid populations separately (Figure 1b), by again applying a  
 184 transformation of variables and separation of time scales. For the local regulation model, the  
 185 appropriate weights for the average allele frequency are similar to the global regulation model,  
 186 where now the class reproductive values, expressed as proportions, are:

$$c_H^L = \frac{1 + \frac{a_H w_R \hat{\rho}_H^L}{(1 - a_D) w_{RR} \hat{\rho}_D^L}}{2 + \frac{a_H w_R \hat{\rho}_H^L}{(1 - a_D) w_{RR} \hat{\rho}_D^L} + \frac{2}{f_R} \frac{a_D w_{RR} \hat{\rho}_D^L}{(1 - a_H) w_R \hat{\rho}_H^L}}, \quad (5a)$$

$$c_D^L = \frac{1 + \frac{2}{f_R} \frac{a_D w_{RR} \hat{\rho}_D^L}{(1 - a_H) w_R \hat{\rho}_H^L}}{2 + \frac{a_H w_R \hat{\rho}_H^L}{(1 - a_D) w_{RR} \hat{\rho}_D^L} + \frac{2}{f_R} \frac{a_D w_{RR} \hat{\rho}_D^L}{(1 - a_H) w_R \hat{\rho}_H^L}}. \quad (5b)$$

187

188 After applying a separation of time scales and conducting a diffusion approximation, we  
 189 conclude that the solution for the fixation probability in a haploid-diploid population, Eqs. (3),  
 190 remains valid for the local regulation model (Supplementary *Mathematica* file), with the average  
 191 selection coefficient now being given by Eqs. (5).

192

### 193 3.3. Effective genetic parameters

194 Using the first and second moments of change in allele frequency, we derive effective  
 195 genetic parameters to compare our results to the dynamics found in the classical model for fully  
 196 haploid or fully diploid organisms (Bessho and Otto 2017). More specifically, we define the  
 197 effective selection coefficient ( $s_e$ ), dominance coefficient ( $h_e$ ), and effective population size ( $N_e$ )  
 198 that would result in the same expected change in allele frequency and variance as in the classical  
 199 diploid model of selection.

200 For selection, the diploid model is:  $\Delta p_{ave} = s_e p_{ave} (1 - p_{ave}) [h_e + (1 - 2h_e) p_{ave}]$   
 201 (Crow and Kimura 1970; Bessho and Otto 2017). Because this equation depends on the allele

202 frequency in the same way as Eq. (3b), we can find the effective and dominance selection  
 203 coefficient from  $\Delta p_{ave}/[p_{ave}(1-p_{ave})] = s_e h_e$  when  $p_{ave} = 0$  and  
 204  $\Delta p_{ave}/[p_{ave}(1-p_{ave})] = s_e(1-h_e)$  when  $p_{ave} = 1$ , yielding:

$$s_e^{Model} = 2s_{ave}^{Model} + 2\hat{c}_D^{Model} \frac{(1-2h)s_{MM}^w}{2}. \quad (6a)$$

$$h_e^{Model} = \frac{2s_{ave}^{Model}}{4s_{ave}^{Model} + 2\hat{c}_D^{Model}(1-2h)s_{MM}^w}. \quad (6b)$$

205 When the mutation is additive ( $h = 1/2$ ), these effective parameters are  $s_e^{Model} = 2s_{ave}^{Model}$  and  
 206  $h_e^{Model} = 1/2$ .

207 We next derive the variance effective population size by equating the one generation  
 208 change in variance (Eq. 3c divided by the time scale,  $N_{tot}$ ) to the variance in allele frequency  
 209 expected in the classical Wright-Fisher model,  $p_{ave}(1-p_{ave})/2N_e$  with  $N_e$  diploid  
 210 individuals, obtaining:

$$N_e^{Model} = \frac{p_{ave}(1-p_{ave})}{2(v^{Model}/N_{tot})} = \frac{N_{tot} \hat{\rho}_H^{Model} \hat{\rho}_D^{Model}}{(c_D^{Model})^2 \hat{\rho}_H^{Model} + 2(c_H^{Model})^2 \hat{\rho}_D^{Model}}. \quad (7)$$

211 Plugging these effective parameters into the formula from the fixation probability in  
 212 the classical diploid Wright-Fisher model (Kimura 1957; 1962; Crow and Kimura 1970, p. 427),  
 213 the fixation probability in a haploid-diploid population given by Eq. 3a can be expressed as:

$$u(p_0^{Model}) = \frac{\int_0^{p_0^{Model}} \exp[-2N_e^{Model} s_e^{Model} \{(2h_e^{Model} - 1)p'(1-p') + p'\}] dp'}{\int_0^1 \exp[-2N_e^{Model} s_e^{Model} \{(2h_e^{Model} - 1)p'(1-p') + p'\}] dp'}. \quad (8)$$

214 Assuming an initially rare and additive mutation ( $h = 1/2$ ) with weak positive selection in a  
 215 large population ( $s_e^{Model} N_e^{Model} p_0^{Model} \approx 0$  and  $s_e^{Model} N_e^{Model} \gg 1$ ), we obtain the classic  
 216 approximation,  $u(p_0^{Model}) \approx 2s_e^{Model} N_e^{Model} p_0^{Model}$ , which upon substituting from Eq. 7 yields:

$$u(p_0^{Model}) \approx \frac{2\hat{\rho}_H^{Model} \hat{\rho}_D^{Model}}{(\hat{\rho}_H^{Model} + 2\hat{\rho}_D^{Model}) \left[ (c_D^{Model})^2 \hat{\rho}_H^{Model} + 2(c_H^{Model})^2 \hat{\rho}_D^{Model} \right]} 2s_{ave}^{Model}. \quad (9a)$$

217 For example, because haploids and diploids have the same reproductive values in the obligately  
 218 sexual case ( $\hat{c}_H^{Model} = \hat{c}_D^{Model} = 1/2$ ), we obtain:

$$u(p_0^{Model}) \approx \frac{8\hat{\rho}_H^{Model}\hat{\rho}_D^{Model}}{(\hat{\rho}_H^{Model} + 2\hat{\rho}_D^{Model})^2} 2s_{ave}^{Model} \quad (9b)$$

219 (Eq. 13a in Bessho and Otto 2017), or simply  $u(p_0^{Model}) \approx 2s_{ave}^{Model}$  if haploid and diploid  
 220 population sizes are equal in terms of number of chromosomes ( $\hat{\rho}_H^{Model} = 2/3$ ).

221 In the next three sections, we explore the implications of these results for the evolution  
 222 of haploid-diploid populations.

223

### 224 3.4. Effective selection in a haploid-diploid population

225 The strength of selection averaged across haploids and diploids,  $s_{ave}^{Model}$ , plays a key  
 226 role in the evolution of haploid-diploid populations. When a mutation is rare, both the rate of  
 227 change in allele frequency (Eq. 3b) and the approximate fixation probability (Eq. 10a) are  
 228 proportional to  $s_{ave}^{Model}$ . We thus begin by exploring how  $s_{ave}^{Model}$  varies as we alter the amount  
 229 of asexual reproduction in haploid and diploid phases. We focus on the case where the mutation  
 230 does not affect fertilization success ( $s_M^f = 0$ ), so that the average selection becomes:

$$s_{ave}^{Model} = c_H^{Model} s_M^w + c_D^{Model} s_{RM}^w, \quad (10)$$

231 in both global and local regulation models (Eqs. (4) and (6)).

232 The relative evolutionary importance of selection in the haploid and diploid phases is  
 233 thus determined by the class reproductive values,  $c_H^{Model}$  and  $c_D^{Model}$  (where  $c_H^{Model} +$   
 234  $c_D^{Model} = 1$ ). Figures 2 (global regulation) and 3 (local regulation) illustrate the proportional  
 235 reproductive value of haploids,  $c_H^{Model}$ , as a function of the degree of asexual reproduction in  
 236 haploids (x-axis) and diploids (ranging from 0.05 in red to 0.95 in blue). With global regulation,  
 237 the frequency of haploidy within the population,  $\hat{\rho}_H^G$  (given by Eq. A.4), varies with the  
 238 parameters (see inset graphs in Figure 2), rising with the frequency of haploid asexuality (x-axis  
 239 in inset) but declining with more asexuality in diploids (from red to blue). By contrast, with local

240 regulation, the frequency of haploidy is held fixed by the strict density dependent competition  
241 that we have assumed ( $\hat{\rho}_H^L = 0.8$  in Figure 3(a)(b) and 0.3 in 3(c)(d)).

242 In the left panels, haploids have a higher fertility ( $w_R/w_{RR} = 5$ ), leading to a higher  
243 haploid reproductive value,  $c_H^{Model}$ , especially with local regulation when haploids are also more  
244 common ( $\hat{\rho}_H^L = 0.8$  in Figure 3a). In the right panels, diploids have a higher fertility ( $w_{RR}/w_R =$   
245 5), leading to a lower haploid reproductive value, especially when haploids are rare ( $\hat{\rho}_H^L = 0.3$  in  
246 Figure 3d).

247 When haploids are primarily sexual ( $a_H \approx 0$ ), increasing asexuality of the haploid  
248 stage typically causes the reproductive value of haploids to rise, unless diploids are fitter and  
249 more frequent (Figure 3d and blue curves in Figure 2b). At the other extreme, the reproductive  
250 value of haploids typically plummets to zero as haploid reproduction becomes primarily asexual  
251 ( $a_H \approx 1$ ) while diploids remain sexual, particularly with local regulation (Figure 3), because  
252 haploids then act as a genetic “sink” contributing little to the diploid sub-population. This  
253 downward trend when haploids are predominantly asexual is also seen with global regulation if  
254 diploids are more fit (Figure 2b), except when the diploid population does not sustain itself and  
255 goes extinct, which occurs when  $a_D < 0.2$  and  $a_H = 1$ . The net result can thus be  
256 non-monotonic (purple curves with  $0.2 < a_D < 0.4$  in Figure 2b and Figure 3(a)(b)(c)).

257

### 258 3.4. Effective population size in a haploid-diploid population

259 We next consider the effective size of haploid-diploid populations with varying degrees  
260 of asexuality. Figure 4 plots the effective population size (Eq. 8) relative to the total population  
261 size,  $N_e^{Model}/N_{tot}$ , as a function of the frequency of haploids,  $\hat{\rho}_H^{Model}$  (x-axis), and the class  
262 reproductive values (with  $c_H^{Model}$  ranging from 0.05 in blue to 0.95 in red). As noted by Bessho  
263 and Otto (2017), the effective population size is highest – and drift weakest – at intermediate

264 frequencies of haploids and diploids, which ensures the least sampling error as organisms  
265 alternate generations.

266           When haploids and diploids have equal reproductive values, as in the fully sexual case  
267 ( $c_H^{Model} = c_D^{Model} = 1/2$ ), the effective population size is maximized at  $\hat{\rho}_H^{Model} \approx 0.586$ . With  
268 asexual reproduction, the peak shifts towards whichever ploidy level has the higher reproductive  
269 value. For example, if haploids have a high reproductive value (red) then the effective population  
270 size is maximized at a higher frequency of haploids, reducing the amount of genetic drift in that  
271 phase. Although not illustrated, the peak shifts to  $N_e^{Model} = \hat{\rho}_D^{Model} N_{tot}$  when future  
272 populations descend only from diploids ( $c_H^{Model} = 0$ ) and to  $N_e^{Model} = (\hat{\rho}_H^{Model}/2) N_{tot}$  when  
273 future populations descend only from haploids ( $c_H^{Model} = 1$ ), effectively becoming diplontic or  
274 haplontic, respectively (with the  $1/2$  arising because haploids have half the number of  
275 chromosomes).

276           Of course, the reproductive values, as well as the frequency of haploids with global  
277 population regulation ( $\hat{\rho}_H^G$ ), depend in turn on the fitness parameters and the extent of asexuality,  
278 as explored in the previous section. Figures 5 (global regulation) and 6 (local regulation)  
279 illustrate the effective population size as a function of the frequency of haploid asexuality,  $a_H$   
280 (x-axis), and the frequency of diploid asexuality ( $a_D$  rising from red to blue), using the  
281 parameters in Figures 2 and 3, respectively. The trends are often non-monotonic, with  $N_e^{Model} /$   
282  $N_{tot}$  values varying around  $1/2$  when the parameter values are intermediate. The effective  
283 population size is often higher when diploids rarely reproduce asexually (red) rather than when  
284 they frequently do (blue), although there are exceptions (particularly when the fitness and  
285 frequency of diploids is high).

286

287 3.6. Fixation probability in a haploid-diploid population

288 We next compare the above results with numerical simulations estimating the fixation  
 289 probability of a newly arisen mutation in a haploid-diploid population. When simulating the  
 290 global regulation model, we assumed that the population has reached the demographic  
 291 equilibrium,  $\hat{\rho}_H^G N_{tot}$  haploids and  $\hat{\rho}_D^G N_{tot}$  diploids (see Appendix A). We then chose one  
 292 resident allele  $R$  at random and replaced it with a mutant allele  $M$ . After mutation, offspring were  
 293 sampled from the parental generation according to a multinomial distribution with expected  
 294 frequencies given by  $x_{(GT)}$ , repeating until the mutant allele fixed or was lost from the  
 295 population. We estimated the fixation probability as the fraction of 10,000 replicate simulations  
 296 leading to fixation.

297 We here consider the additive case ( $h = 1/2$  and  $h_e = 1/2$ ), where the fixation  
 298 probability (Eq. 8) simplifies to:

$$u(p_0^{Model}) = \frac{\exp[-2p_0^{Model} N_e^{Model} s_e^{Model}] - 1}{\exp[-2N_e^{Model} s_e^{Model}] - 1} \quad (11)$$

299 and where  $s_e^{Model} = 2 s_{ave}^{Model}$  (Eq. 6). Figure 7 plots the fixation probability as a function of the  
 300 average selection pressure,  $s_{ave}^{Model}$ , when the reproductive values and chromosome numbers in  
 301 haploids and diploids are equal ( $c_H^{Model} = c_D^{Model}$  and  $\hat{\rho}_H^{Model} = 2/3$ ) and  $s_{ave}^{Model} = [(1/$   
 302  $2s_{Mw} + 1/2s_{RMw})]$ . The diffusion Eq. (11) provides an excellent fit, as does the approximation  
 303 Eq. (9b) for selection coefficients that are positive and not too weak. In this case, the results are  
 304 the same with global and local population regulation (Fig. 7a and 7b, respectively) and are  
 305 insensitive to how much selection occurs in the haploid or diploid phases ( $s_M^{Model}$  and  $s_{RM}^{Model}$ ,  
 306 respectively), as long as  $s_{ave}^{Model}$  is held constant (see additional simulations in Supplementary  
 307 *Mathematica* file). As expected, the extent of selection in the haploid versus diploid phase  
 308 matters more when the mutation is not additive ( $h \neq 1/2$  and  $h_e \neq 1/2$ ) (supplementary  
 309 *Mathematica* file).

310 Next, we illustrate the approximate fixation probability, Eq. (9a), as a function of the

311 degree of asexuality ( $a_H$  and  $a_D$ ) when the population size is globally (Fig. 8) or locally (Fig. 9)  
312 regulated, assuming only selection in haploids or only in diploids. For example, with additive  
313 mutations, the fixation probability can be approximated as  $u \approx 4c_H^{Model} N_e^{Model} p_0^{Model} s_M^w$  when  
314 selection occurs only in the haploid phase or  $u \approx 4c_D^{Model} N_e^{Model} p_0^{Model} s_{RM}^w$  with selection only  
315 in the diploid phase, indicating that the fate of mutations depends as much on the strength of  
316 selection as on the reproductive value of the ploidy phase in which selection acts (as illustrated in  
317 Fig. 2 and 3). Figures 8 (global) and 9 (local) illustrate how the fixation probability depends on  
318 the various parameters in the model, particularly the amount of asexual reproduction in haploids  
319 ( $x$ -axis) and diploids ( $a_D$  rising from red to blue). The trends can be understood by the combined  
320 effects of the parameters on the reproductive value and the effective population size (e.g., Fig.  
321 9(a) is proportional to the product of Fig. 3(a) and Fig. 6(c)).

322

#### 323 4. Discussion

324 Across the phylogenetic tree of life, organisms have diverse and complex reproductive  
325 strategies (Bell 1982). Classical population genetic theory has, however, focused most on fully  
326 haploid or diploid life cycles with obligate sexuality. In this article we develop a stochastic  
327 model for the population genetics of haploid-diploid organisms considering demography,  
328 asexuality, and habitat differentiation between haploid and diploid stages. Using a separation of  
329 time scales, we derive a diffusion approximation for the change in allele frequency, allowing us  
330 to estimate the fixation probability of new mutations, the effective strengths of selection and  
331 dominance, as well as the effective population size of haploid-diploid populations.

332

##### 333 5.1. Natural selection in a haploid-diploid population

334 Our results indicate that the strength of natural selection and the extent of genetic drift



335 depend strongly on the reproductive value of haploid versus diploid phases. In the simplest case,  
336 when the effect of a mutation is weak, additive, positive, and absent in the gamete stage ( $s_M^f = 0$ ),  
337 the fixation probability is proportional to the effective strength of selection (Eq. 10),  $s_e^{Model} =$   
338  $2s_{ave}^{Model}$ , which in turn is proportional to the amount of selection in and the reproductive value of  
339 haploids and diploids (Eqs. 2, and 5).

340         These analytical results reveal some evolutionary principles for populations that  
341 undergo an alternation of generations. One consequence is that the balance of opposing selection  
342 pressures in haploids and diploids (Eqs. 4 and 6) depends not only on the selection coefficients,  
343 but also on the relative reproductive values of haploids ( $c_H^{Model}$ ) versus diploids ( $c_D^{Model}$ ). Thus,  
344 the very direction of evolution depends on the extent of asexuality in the two phases and the  
345 relative survival and fertility of haploids versus diploids when there is “ploiddally antagonistic  
346 selection” (Immler et al. 2012).

347         The efficacy of selection to fine tune traits in haploids and diploids also depends on the  
348 class reproductive values. For example, when the population is regulated by local density  
349 dependence (i.e., the haploid and diploid phases are spatially or temporally distinct), higher  
350 reproductive success in haploids increases the efficiency of haploid selection (compare Figure 3a  
351 to 3b). However, when there is extremely rare sexuality in haploids ( $a_H$  near one), diploid  
352 selection tends to be more effective because of increasing competition between offspring from  
353 haploids. By contrast, the trends differ with global density dependence (e.g., species that are  
354 more isomorphic with small ecological differences between stages). For example, the  
355 reproductive value of haploids remains high even when they reproduce primarily asexually in the  
356 global regulation model (see Figure 2 when  $a_H$  approaches one), because haploids then make up  
357 a larger proportion of the total population size (see inset figures). Thus, whether selection is  
358 effective in the haploid phase when that phase mainly reproduces asexually is quite sensitive to

359 the nature of competition.

360 Our work can also be useful in the design of field studies and the interpretation of data  
361 for species that alternate generations. To understand the efficiency of selection on haploid and  
362 diploid phases, we not only need data about the fraction of haploids and diploids and their  
363 fertility and mortality (e.g., Thornber and Gains 2004; Vieira et al., 2018a; Vieira et al. 2018b),  
364 but we also need to know about the extent of asexuality in each phase and whether they compete  
365 for common or different resources.

366

### 367 5.2. Genetic drift and effective size

368 The impact of random genetic drift on the genetic diversity of haploid-diploid  
369 population depends on the effective population size (Eq. 7). As we had found previously in a  
370 haploid-diploid model with obligate sexuality (Bessho and Otto 2017, pp. 431), the effective  
371 population size with asexuality is generally smaller than the total number of individuals and  
372 again depends strongly on the reproductive value of each phase (Figures 4-6). With obligate  
373 sexuality, the reproductive values of haploids and diploids are equal, and the effective population  
374 size is maximized (drift minimized) when haploids comprise  $2/3$  of the population, making the  
375 number of chromosomes equal between haploids and diploids. Asexual reproduction, however,  
376 causes the reproductive value of haploids and diploids to differ (Eqs. 2 and 5). Consequently,  
377 drift is lessened if the phase with the higher reproductive value is more common (see shifts in  
378 peaks in Figure 4).

379

### 380 5.3. "Ploidally-structured" population

381 The key role that reproductive values play in this work is analogous to the role that  
382 patch dynamics play in two-patch models of evolution. In a spatially structured population,

383 subdivided local populations are genetically connected by migration. A haploid-diploid system  
384 can be seen as being ploidy structured, where gene flow describes the movement of alleles  
385 through sexual reproduction, with meiosis causing flow to haploidy and syngamy flow to  
386 diploidy. We note that our research reveals that all qualitative results are equally accurate for  
387 evolution in a two-patch system (see Supplementary *Mathematica* File). For example, fixation  
388 probability strongly depends on class reproductive values of each patch.

389         This analogy suggests an interesting idea: complex reproductive systems can be  
390 considered and analyzed using the tools of metapopulation theory. For example, many  
391 eukaryotes including terrestrial plants, insects, and fishes, often exhibit ploidy variation,  
392 including polyploid members (Otto and Whitton 2000; Comai 2005). In such species, individuals  
393 characterized by different numbers of chromosomes coexist, with complex reproductive  
394 relationships causing gene flow between them (Ramsey and Schemske 1998). Similarly, social  
395 insects often exhibit complex sex determination systems linked with ploidy levels  
396 (haplodiploidy).

397         Our research suggests that these ploidy-structured populations can be fruitfully  
398 treated as metapopulations. Selection and drift in populations with diploids, triploids, and  
399 tetraploids can, for example, be considered as a three-patch model. In this system, we conjecture  
400 that the average strength of selection that is evolutionarily relevant would be the mean selection  
401 coefficient in each ploidy class, weighted by its class reproductive value, with additional terms  
402 coming from reproductive interactions (akin to the term of  $s_M^f$  in Eqs. 4).

403         Many evolutionary aspects of haploid-diploid populations remain to be investigated.  
404 One avenue that we are exploring is how model parameters can be estimated from field data. For  
405 example, the analogy between spatially and ploidy structured population suggests that genetic  
406 differences between haploids and diploid can be used to estimate gene flow between them (i.e.,

407 rates of sex), akin to using  $F_{st}$  to inform estimates of migration (e.g., Slatkin 1987). Another  
408 fruitful avenue for further work is to determine how fluctuations in population size affect the  
409 effective population size of species that alternate generations. In classical population genetics  
410 theory, such fluctuations can be captured by using the harmonic mean population in place of the  
411 total population size (Karlin 1968). It is unclear, however, whether the same is true in  
412 haploid-diploid populations. Can the harmonic total population size simply replace  $N_{tot}$  in the  
413 global model of population regulation? Similarly, can the harmonic population sizes of haploids  
414 and diploids replace  $N_H$  and  $N_D$  with local regulation? The answer is unclear because  
415 population size fluctuations perturb the fast ecological dynamics away from the steady state  
416 (especially  $\hat{\rho}_H^{Model}$ ), and the impact of these perturbations on selection and drift is unknown.  
417 Further research is needed to clarify evolutionary processes in the wide variety of species that  
418 alternate generations.

419

## 420 **Acknowledgements**

421 We here thank Alireza Ghaseminejad for help in developing our manuscript. We also thank H.  
422 Ohtsuki and Y. Uchiumi for the helpful comment.

423

## 424 **Funding sources**

425 This project was funded by a Grand-in-Aid from a Japan Society for the Promotion of Science  
426 (JSPS) to KB (16J05204) and by a Discovery grant from the Natural Sciences and Engineering  
427 Research Council of Canada (NSERC RGPIN-2016-03711) to S.P.O.

428

## 429 **Appendix A. Fixation probability in a haploid-diploid Wright-Fisher model using a** 430 **diffusion approximation**

431 A.1. Equilibrium with global regulation

432 We derive the fixation probability in a haploid-diploid population using a diffusion  
 433 approximation (e.g., Bessho and Otto 2017). We first derive the stable equilibrium in the global  
 434 regulation model, allowing for asexual reproduction in each phase. In the Wright-Fisher model,  
 435 all individuals reproduce and then the parents die (non-overlapping generations). Let  $b_{(GT)}$   
 436 represent the number of reproductive cells of each type in the next generation:

$$b_R = (1 - a_D)w_{RR}x_{RR} + (1 - a_D)\frac{w_{RM}x_{RM}}{2} + a_H w_R x_R, \quad (\text{A.1a})$$

$$b_M = (1 - a_D)\frac{w_{RM}x_{RM}}{2} + (1 - a_D)w_{MM}x_{MM} + a_H w_M x_M, \quad (\text{A.1b})$$

$$b_{RR} = (1 - a_H)\frac{f_R}{2}\frac{w_R^2 x_R^2}{w_R x_R + w_M x_M} + a_D w_{RR} x_{RR}, \quad (\text{A.1c})$$

$$b_{RM} = (1 - a_H)\frac{f_R + f_M}{2}\frac{w_R w_M x_R x_M}{w_R x_R + w_M x_M} + a_D w_{RM} x_{RM}, \quad (\text{A.1d})$$

$$b_{MM} = (1 - a_H)\frac{f_M}{2}\frac{w_M^2 x_M^2}{w_R x_R + w_M x_M} + a_D w_{MM} x_{MM}. \quad (\text{A.1e})$$

437 The probability that a reproductive cell of genotype ( $GT$ ) is sampled from the offspring produced  
 438 by the previous generation of adults is

$$q_{(GT)} = \frac{b_{(GT)}}{b_R + b_M + b_{RR} + b_{RM} + b_{MM}}. \quad (\text{A.2})$$

439 Therefore, the composition of offspring in the next generation is given by the multinomial  
 440 distribution, sampling  $N_{tot}$  individuals in proportion to Eq. (A2). Using Eq. (A1) and (A2), we  
 441 describe the conditional expectation of change in the number of individuals of genotype ( $GT$ ),  
 442  $\Delta X_{(GT)}(t) = X_{(GT)}(t+1) - X_{(GT)}(t)$ , as

$$\mathbb{E}[\Delta X_{(GT)}(t) | \vec{X}(t) = \vec{x}] = N_{tot} q_{(GT)} - x_{(GT)}, \quad (\text{A.3})$$

443 where  $E[\Delta F(X_{(GT)}(t)) | \vec{X}(t) = \vec{x}]$  is the conditional expected value for change in the function

444  $F$  of the random variable given that  $\vec{X}(t) = (X_R(t) \ X_M(t) \ X_{RR}(t) \ X_{RM}(t) \ X_{MM}(t))^T$

445 equals  $\vec{x} = (x_R \ x_M \ x_{RR} \ x_{RM} \ x_{MM})^T$ .

446 To simplify this fully stochastic system, we assume that the resident population is large

447 and treat demographic changes deterministically prior to the appearance of the mutation.

448 Considering the dynamics of the resident population, we then find the equilibrium of these

449 dynamical equations by solving  $N_{tot}q_R - \hat{x}_R = 0$  and  $N_{tot}q_{RR} - \hat{x}_{RR} = 0$  ( $\hat{x}_R + \hat{x}_{RR} = N_{tot}$ ).

450 Setting  $\hat{x}_R = \hat{\rho}_H^G N_{tot}$  and  $\hat{x}_{RR} = \hat{\rho}_D^G N_{tot}$ , the fraction of haploids  $\hat{\rho}_H^G$  (and diploids  $\hat{\rho}_D^G = 1 -$

451  $\hat{\rho}_H^G$ ) at equilibrium becomes,

$$\hat{\rho}_H^G = \frac{a_H w_R + a_D w_{RR} - 2w_{RR} + \sqrt{4(1 - a_H)(1 - a_D)\tilde{w}_R w_{RR} + (a_H w_R - a_D w_{RR})^2}}{2[a_H w_R + (1 - a_H)\tilde{w}_R - w_{RR}]}, \quad (\text{A.4})$$

452 where  $\tilde{w}_R = f_R w_R / 2$  is the fitness of haploids considering the cost of sex (see Supplementary

453 *Mathematica* file for the step-by-step derivation). We note that, when the fertility of haploids is

454 much greater than that of diploids ( $w_R \gg w_{RR}$ ), the frequency of haploids in a population

455 approaches  $a_H / \{a_H + [(1 - a_H)f_R / 2]\}$ , which is less than one because sexual reproduction of

456 the haploids produces diploids (the  $(1 - a_H)f_R / 2$  term). Conversely, when the fertility of

457 diploids is much greater than haploids ( $w_R \ll w_{RR}$ ), the frequency of haploids approaches

458  $1 - a_D$ , the rate at which diploids undergo meiosis.

459

460 A.2. First moment of change in allele frequency

461 To derive the first moment of change in allele frequency,  $m^{Model}(p_{ave})$ , we apply a

462 separation of time scales (e.g., Nagylaki 1976; Otto and Day 2007; Bessho and Otto 2017).

463 Details of the calculation are represented in the Supplementary *Mathematica* file. We first

464 transform the expected change in the number of individuals of each type (five variables that sum

465 to  $N_{tot}$ ) into the expected change in a new set of four variables,  $\theta \in \{p_{ave}, \delta_p, \eta_{HW}, \rho_H\}$ ,

466 described by the functions:

$$E[\Delta\theta | \vec{X}(t) = \vec{x}] = f_{\theta}^{Model}(\epsilon, p_{ave}, \vec{\theta}), \quad (\text{A.5})$$

467 where  $\vec{\theta} = (\delta_p, \eta_{HW}, \rho_H)$  and  $\epsilon$  is proportional to the selection coefficients and assumed small

468 (the functions  $f$  are given explicitly in the Supplementary *Mathematica* file). With local

469 regulation,  $\rho_H$  is assumed fixed at  $N_H/N_{tot}$  and dropped from the variable set,  $\theta$ .

470 To constant order (setting the small changes due to selection to zero,  $\epsilon \rightarrow 0$ ), the fast

471 ecological dynamics of the system are described by:  $f_{\theta}^{Model}(0, p_{ave}, \vec{\theta})$ . This system of

472 equations rapidly approaches a steady state found by solving  $f_{\theta}^{Model}(0, p_{ave}, \vec{\theta}) = 0$ , which

473 gives  $\bar{\delta}_p = \bar{\eta}_{HW} = 0$ , and  $\bar{\rho}_H = \hat{\rho}_H^G$  (Eq. A.4). To this order, the steady state change in allele

474 frequency is zero,  $f_{p_{ave}}^{Model}(0, p_{ave}, \vec{\theta}) = 0$ . We then describe slower changes, including changes

475 in allele frequency due to selection, by describing the deviations that occur around this steady

476 state. Specifically, to order  $\epsilon$ , the variables are allowed to deviate from the steady state by

477  $\delta_p = \tilde{\delta}_p \epsilon$ ,  $\eta_{HW} = \tilde{\eta}_{HW} \epsilon$ , and  $\rho_H = \hat{\rho}_H^G + \tilde{\rho}_H \epsilon$ , and the dynamics  $f_{\theta}^{Model}(\epsilon, p_{ave}, \vec{\theta})$  are then

478 approximated using a Taylor series expansion. Defining the average allele frequency by

479 combining haploid and diploid populations using an arbitrary weighting,  $p_{ave} = \omega p_H +$

480  $(1 - \omega)p_D$ , we show in the Supplementary *Mathematica* file that setting the weights proportional

481 to the class reproductive values (given by Eq. (2) with global regulation and Eq. (5) with local

482 regulation) is the only choice that separates evolutionary change in  $p_{ave}$  from changes in the

483 other variables to order  $\epsilon$ . Defining the average allele frequency in this way (Eq. 1a) and taking

484 the Taylor series, the change in allele frequency becomes:

$$E[\Delta p_{ave} | \vec{X}(t) = \vec{x}] \approx M^{Model}(p_{ave}) \quad (\text{A.6})$$

$$= \frac{p_{ave}(1 - p_{ave})}{2} \left[ 2s_{ave}^{Model} + 2c_D^{Model} p_{ave}(1 - 2h)s_{MM}^w \right].$$

485

486 A.3. Second moment of change in average allele frequency

487 We next derive the second moment of change in average allele frequency in a  
 488 haploid-diploid population with asexuality. We again assume that the population size is very  
 489 large, that selection is very weak, and that the system has approached the steady state in  
 490  $(\delta_p, \eta_{HW}, \rho_H)$ , ignoring deviations that are of  $O(\epsilon)$ . Because selection is assumed weak, the  
 491 second moment is well approximated by that of the neutral model (to constant order,  $\epsilon \rightarrow 0$ ).

492 Under these assumptions, the fraction of haploids in a population is relatively fixed in  
 493 both the global and local regulation models, and we can sample the haploid offspring according  
 494 to a binomial distribution, with expectation and variance:  $E[X_M | \vec{X}(t) = \vec{x}] = q_M N_H$  and  
 495  $\text{Var}[X_M | \vec{X}(t) = \vec{x}] = q_M(1 - q_M)N_H$  where  $q_M = b_M / (b_R + b_M)$ . To simplify the equation, we  
 496 set  $E[X_{(GT)} | \vec{X}(t) = \vec{x}] = m_{(GT)}$  and  $\text{Var}[X_{(GT)} | \vec{X}(t) = \vec{x}] = v_{(GT)}$ , finding that:

$$E[\Delta X_M | \vec{X}(t) = \vec{x}] = m_M - x_M, \quad (\text{A.7a})$$

$$E[(\Delta X_M)^2 | \vec{X}(t) = \vec{x}] = v_M + m_M^2 - 2m_M x_M + x_M^2. \quad (\text{A.7b})$$

497 In terms of allele frequencies (rather than numbers), we have the first and second moments for

498 the haploid offspring population,  $E\left[\frac{\Delta X_M}{N_H} | \vec{X}(t) = \vec{x}\right] = \frac{1}{N_H} E[\Delta X_M | \vec{X}(t) = \vec{x}]$  and

499  $E\left[\left(\frac{\Delta X_M}{N_H}\right)^2 | \vec{X}(t) = \vec{x}\right] = \frac{1}{N_H^2} E[(\Delta X_M)^2 | \vec{X}(t) = \vec{x}].$

500 Similarly, the diploid offspring are sampled according to a trinomial distribution, with

501 expectation, variance, and covariance:  $m_{(GT)} = q_{(GT)} N_D$ ,  $v_{(GT)} = q_{(GT)}(1 - q_{(GT)})N_D$ , and

502  $\text{Cov}[X_{RM}, X_{MM} | \vec{X}(t) = \vec{x}] = q_{RM} q_{MM} N_D$ , where  $q_{(GT)} = b_{(GT)} / (b_{RR} + b_{RM} + b_{MM})$ . To derive

503 the moments of the allele frequency in diploids, we define,  $y_M = (x_{RM}/2) + x_{MM}$  and

504  $Y_M = (X_{RM}/2) + X_{MM}$ . The moments of random variable  $Y$  are then:



$$E[Y_M | \vec{X}(t) = \vec{x}] = \frac{m_{RM}}{2} + m_{MM}, \quad (\text{A.8a})$$

$$E[Y_M^2 | \vec{X}(t) = \vec{x}] = \frac{v_{RM} + m_{RM}^2}{4} + (\text{Cov}[X_{RM}, X_{MM} | \vec{X}(t) = \vec{x}] + m_{RM}m_{MM}) + (v_{MM} + m_{MM}^2), \quad (\text{A.8b})$$

$$E[\Delta Y_M | \vec{X}(t) = \vec{x}] = \frac{E[\Delta X_{RM} | \vec{X}(t) = \vec{x}]}{2} + E[\Delta X_{MM} | \vec{X}(t) = \vec{x}] - y_M, \quad (\text{A.8c})$$

$$E[(\Delta Y_M)^2 | \vec{X}(t) = \vec{x}] = E[Y_M^2 | \vec{X}(t) = \vec{x}] - 2E[Y_M | \vec{X}(t) = \vec{x}]y_M + y_M^2. \quad (\text{A.8d})$$

505 To consider the change in average allele frequency across the entire population, we

506 define  $Z_M = c_H^{Model} \frac{X_M}{N_H} + c_D^{Model} \frac{Y_M}{N_D}$  and consider the expectation of change in this random

507 variable. Plugging in Eqs. (7a), (7b), (8c), and (8d), we have

$$E[(\Delta Z_M)^2 | \vec{X}(t) = \vec{x}] = \frac{p_{ave}(1 - p_{ave}) \left[ (c_D^{Model})^2 \hat{\rho}_H^{Model} + (c_H^{Model})^2 (2\hat{\rho}_D^{Model}) \right]}{\hat{\rho}_H^{Model} (2\hat{\rho}_D^{Model}) N_{tot}}. \quad (\text{A.9})$$

508 After transforming time scales using the variable  $\tau = t/N_{tot}$  and defining  $P(\tau) = Z(N_{tot}\tau)$ ,

509 we have the diffusion coefficient  $v^{Model}(p_{ave}) = \lim_{N_{tot} \rightarrow \infty} E \left[ \frac{(P(\tau + \Delta\tau) - P(\tau))^2}{\Delta\tau} \right]$  by taking the

510 limit  $N_{tot} \rightarrow \infty$ , giving Eq. (3c). Similarly, we derive the drift coefficient using Eq. (A6)

511 ( $m^{Model} = M^{Model} N_{tot}$ ), giving Eq. (3b).

512

## 513 References

514 Bell, G. 1982. The Masterpiece of Nature: The Genetics and Evolution of Sexuality. University  
515 of California Press. Berkeley, CA.

516 Bell, G., 1994. The comparative biology of the alternation of generations. Lectures on  
517 mathematics in the life sciences 25, 1–26.

518 Bessho, K., Otto, S. P. 2017. Fixation probability in a haploid-diploid population. *Genetics* 205,  
519 421-440.

520 Comai, L. 2005. The advantages and disadvantages of being polyploid. *Nature Reviews Genetics*  
521 6, 836-846.

522 Coelho, S. M., Peters, A. F., Charrier, B., Roze, D., Destombe, C., Valero, M., Cock, J. M., 2007.

523 Complex life cycles of multicellular eukaryotes: new approaches based on the use of

524 model organisms. *Gene* 406, 152–170.

- 525 Crow, J. F., Kimura, M. (1970). An introduction to population genetics theory. The Blackburn  
526 Press, New Jersey.
- 527 Deithier, M. N. (1981). Heteromorphic algal life histories: The seasonal pattern and response to  
528 herbivory of the brown crust, *Ralfsia californica*. *Oecologia* 49, 333-339.
- 529 Destombe, C., Godin, J., Nocher, M., Richerd, S., Valero, M. (1993). Differences in response  
530 between haploid and diploid isomorphic phases of *Gracilaria verrucosa* (Rhodophyta:  
531 Gigartinales) exposed to artificial environmental conditions. *Hydrobiologia* 260/261,  
532 131-137.
- 533 De Wreede, R. E., Klinger, T. 1988. Reproductive strategies in algae. *Plant reproductive ecology:*  
534 *Patterns and strategies*, 267-284.
- 535 Dyck, L. J., De Wreede, R. E. (2006). Seasonal and spatial patterns of population density in the  
536 marine macroalga *Mazzaella splendens* (Gigartinales, Rhodophyta). *Phycological*  
537 *Research*, 54(1), 21-31.
- 538 Goldstein, D. B. 1992. Heterozygote advantage and the evolution of dominant diploid phase.  
539 *Genetics* 132, 1195–1198.
- 540 Hagues, J. S., Otto, S. P. 1999. Ecology and the evolution of biphasic life cycles. *The American*  
541 *Naturalist* 154, 306–330.
- 542 Hannach, G., Santelicesm, B. 1985. Ecological differences between the isomorphic reproductive  
543 phases of two species of *Iridaea* (Rhodophyta: Gigartinales). *Marine Ecology Progress*  
544 *Series* 22, 291–303.
- 545 Hawkes, M. W. 1990. Reproductive strategies. *Biology of the red algae*, 455-476.
- 546 Immler, S., G. Arnqvist, and S. P. Otto. 2012. Ploidally antagonistic selection maintains stable  
547 genetic polymorphism. 66:55–65.
- 548 Jenkins, C. D., Kirkpatrick, M., 1995. Deleterious mutation and the evolution of genetic life  
549 cycles. *Evolution*, 512–520.
- 550 Karlin, S. 1968. Rates of approach to homozygosity for finite stochastic models with variable  
551 population size. *The American Natualist* 102, 443-455.
- 552 Kimura, M., 1957. Some problems of stochastic processes in genetics. *The Annals of*  
553 *Mathematical Statistics*, 882-901.
- 554 Kimura, M., 1962. On the probability of fixation of mutant genes in a population. *Genetics* 47,  
555 713.
- 556 Mable, K. B., Otto, P. S., 1998. The evolution of life cycles with haploid and diploid phases.  
557 *BioEssays* 20, 453–462.
- 558 Nagylaki, T., 1976. The evolution of one-and two-locus systems. *Genetics* 83, 583-600.
- 559 Orr, H. A., Otto, S. P. 1994. Does diploidy increase the rate of adaptation? *Genetics* 136,  
560 1475–1480.

- 561 Otto, S., Goldstein, D., 1992. Recombination and the evolution of diploidy. *Genetics* 131,  
562 745–751.
- 563 Otto, S., 1994. The role of deleterious and beneficial mutations in the evolution of ploidy levels.  
564 *Lectures on Mathematica in the Life Sciences* 25, 69–98.
- 565 Otto, S. P., Marks, J. C. 1996. Mating system and the evolutionary transition between haploidy  
566 and diploidy. *Biological Journal of the Linnean Society* 57, 197-218.
- 567 Otto, S. P., Day, T., 2007. *A biologist's guide to mathematical modeling in ecology and evolution*.  
568 Princeton University Press.
- 569 Otto, S. P., Whitton, J. 2000. Polyploid incidence and evolution. *Annu. Rev. Genet.* 34, 401-437.
- 570 Perrot, V., Richerd, S., Valéro, M., 1991. Transition from haploidy to diploidy. *Nature* 351,  
571 315–317.
- 572 Ramsey, J., Schemske, D. W. 1998. Pathways, mechanisms, and rates of polyploid formation in  
573 flowering plants. *Annual reviews of Ecology and Systematics* 29: 467-501.
- 574 Raper, J. R., Flexer, A. S. (1970). The road to diploidy with emphasis on a detour. In *Symp. Soc.*  
575 *Gen. Microbiol* (Vol. 20, pp. 401-432).
- 576 Rousset, F. (2004). *Genetic structure and selection in subdivided populations*. Princeton  
577 University Press, New Jersey.
- 578 Scott, M. F., Rescan, M. 2016. Evolution of haploid-diploid life cycles when haploid and diploid  
579 fitnesses are not equal. *Evolution* 71, 215–226.
- 580 Slatkin, M. 1987. Gene flow and the geographic structure of natural populations. *Science New*  
581 *Series* 236: 787-792.
- 582 Slocum C. J. 1980. Differential susceptibility to grazers in two phases of an intertidal alga:  
583 Advantages of heteromorphic generations. *Journal of Experimental Marine Biology and*  
584 *Ecology* 46, 99-110.
- 585 Taylor, P. D. 1980. Allele-Frequency Change in a Class-Structured Population. *The American*  
586 *Naturalist* 135, 95-106.
- 587 Thornber, C. S., Gains, S. D. 2004. Population demographics in species with biphasic life cycle.  
588 *Ecology* 85, 1661-1674.
- 589 Thornber, C., Stachowicz, J. J., Gains, S. 2006. Tissue type matters: selective herbivory on  
590 different life history stages of an isomorphic alga. *Ecology* 87, 2255-2263.
- 591 Vieira, V. M. N. C. S., Engelen, A. H., Huanel, O. R., Guillemin, M. 2018a. Haploid females in  
592 the isomorphic biphasic life-cycle of *Gracilaria chilensis* excel in survival. *BMC*  
593 *Evolutionary Biology* 18:174.
- 594 Vieira, V. M. N. C. S., Engelen, A. H., Huanel, O. R., Guillemin, M. 2018b. Differentiation of  
595 haploid and diploid fertilities in *Gracilaria chilensis* affect ploidy ratio. *BMC*  
596 *Evolutionary Biology* 18:183.

597 Willson, M. F. 1981. On the evolution of complex life cycles in plants: a review and an  
598 ecological perspective. *Annals of the Missouri Botanical Garden* 68, 275-300.

599

## 600 **Figure Captions**

601 Fig. 1. An illustration of the haploid-diploid models. (a) In the global regulation model, both  
602 haploids and diploids occupy the same habitat and density dependence holds the total population  
603 size  $N_{tot}$  constant. (b) In the local regulation model, each ploidy stage occupies a different habit,  
604 therefore density dependence regulates the population size of haploids ( $N_H$ ) and diploids ( $N_D$ )  
605 separately.

606

607 Fig. 2. Class reproductive value of haploids in the global regulation model,  $c_H^G$ . Curves show  $c_H^G$   
608 as a function of the degree of haploid asexuality,  $a_H$  (x-axis), with the degree of diploid  
609 asexuality ranging in color from  $a_D = 0.05$  (red) to 0.95 (blue) in increments of 0.05. Other  
610 parameters are set as: (a)  $f_R = 0.5$ ,  $w_R = 5000$ ,  $w_{RR} = 1000$ , (b)  $f_R = 0.5$ ,  $w_R = 1000$ ,  
611  $w_{RR} = 5000$ . The resulting frequency of haploids,  $\hat{\rho}_H^G$  (Eq. A.4), is shown in the inset plots.

612

613 Fig. 3. Proportional reproductive value of haploids in the local regulation model,  $c_H^L$ . Parameters  
614 are the same as Fig. 2, except that haploids are held fixed at a frequency of (a)(b)  $\hat{\rho}_H^L = 0.8$  or  
615 (c)(d)  $\hat{\rho}_H^L = 0.3$ . We consider the case when (a)(c) haploid fitness parameter is larger than  
616 diploid  $w_R = 5000$ ,  $w_{RR} = 1000$  ( $w_H > w_D$ ), and when (b)(d) diploid fitness parameter is  
617 larger than haploid  $w_R = 1000$ ,  $w_{RR} = 5000$  ( $w_H < w_D$ ).

618

619 Fig. 4. The effective population size of a haploid-diploid population. The relative effective  
620 population size over the total population size ( $N_e^{Model}/N_{tot}$ , Eq. 7) is shown as a function of the  
621 frequency of haploids ( $\hat{\rho}_H^{Model}$ , x-axis), when the haploid reproductive value ( $c_H^{Model}$ ) varies from

622 0.05 (blue) to 0.95 (red) in increments of 0.05. This figure applies to both global and local  
623 regulation models.

624

625 Fig. 5. The effective population size of a haploid-diploid population in the global regulation  
626 model as a function of the degree of asexuality,  $a_H$  and  $a_D$ . Parameters are the same as in Fig. 2  
627 and determine the relative class reproductive values ( $c_H^G$ ) and fraction of haploids ( $\hat{\rho}_H^G$ ) according  
628 to Eqs. (2a) and (A.4).

629

630 Fig. 6. The effective population size of a haploid-diploid population in the local regulation model.  
631 Parameters are the same as in Fig. 3 and determine the relative class reproductive values ( $c_H^L$ ) by  
632 Eqs. (5). The frequencies of haploids are held fixed at a frequency of (a)(b)  $\hat{\rho}_H^L = 0.9$ , (c)(d)  
633  $\hat{\rho}_H^L = 0.8$ , (e)(f)  $\hat{\rho}_H^L = 0.6$ , or (g)(h)  $\hat{\rho}_H^L = 0.3$ .

634

635 Fig. 7. Fixation probability given the average strength of selection,  $s_{ave}^{Model}$ , for global (a) and  
636 local (b) regulation models. The solid curve gives the analytical result from the diffusion  
637 approximation (Eq. (11)) and the dashed curve gives the linear approximation (Eq. (9b)). Black  
638 dots indicate the fixation probability estimated from 10000 numerical simulations with 95% CI  
639 (Wilson score interval for binomial). Parameters:  $N_{tot} = 90$ ,  $N_H = 60$ ,  $N_D = 30$ ,  $f_R = 0.5$ ,  
640  $w_R = w_{RR} = 1000$ ,  $a_H = a_D = 0.1$ ,  $h = 0.5$ ,  $s_M^f = 0$ ,  $s_M^w = s_{RM}^w = s_{ave}^{Model}$ , such that the  
641 fraction of haploids in the resident population is  $\hat{\rho}_H^{Model} = 2/3$  and class reproductive values  
642 are equal  $c_H^{Model} = c_D^{Model} = 1/2$ . Holding  $s_{ave}^{Model} = 1/2(s_M^w + s_{RM}^w)$  constant, similar results  
643 are obtained for a range of different choices of  $s_M^w$  and  $s_{RM}^w$  (see supplementary *Mathematica*  
644 file).

645

646 Fig. 8. The fixation probability in a haploid-diploid population in the global regulation model.

647 Curves gives the linear approximation for the fixation probability (Eq. (9a)). Parameters are the

648 same as in Fig. 2. Selection acts only in the haploid or diploid phase, with selection coefficients

649 set as  $s_M^W = 0.02$  for haploid selection (a)(b) and  $s_{RM}^W = 0.02$  for diploid selection (c)(d).

650

651 Fig. 9. The fixation probability in a haploid-diploid population in the local regulation model.

652 Curves gives the linear approximation for the fixation probability (Eq. (9a)). Parameters are the

653 same as in Fig. 3 and Fig. 8. The frequency of haploids is held fixed at (a)(b)(e)(f)  $\hat{\rho}_H^L = 0.8$ ,

654 (c)(d)(g)(h)  $\hat{\rho}_H^L = 0.3$ . Fitness of haploids is higher than diploids in panels (a)(c)(e)(g)

655 ( $w_H > w_D$ ), and the opposite condition is considered in panels (b)(d)(f)(h) ( $w_H < w_D$ ). Selection

656 only occurs in the haploid (a)(b)(c)(d) or diploid stage (e)(f)(g)(h).

657

## 658 **Supporting information**

659 S1. Supplementary *Mathematica* file.

# Figure 1

(a)

**Global regulation**

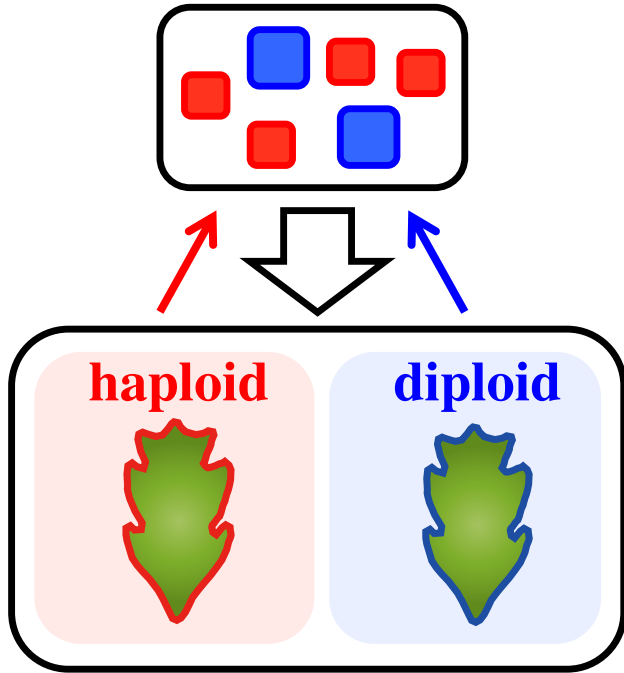

Total population size:  $N_{\text{tot}}$

(b)

**Local regulation**

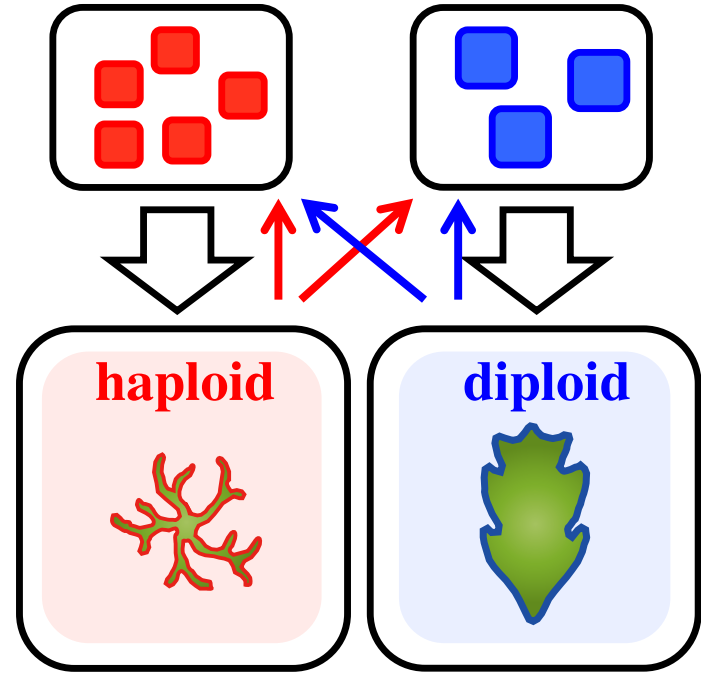

$N_{\text{H}}$

$N_{\text{D}}$

# Figure 2

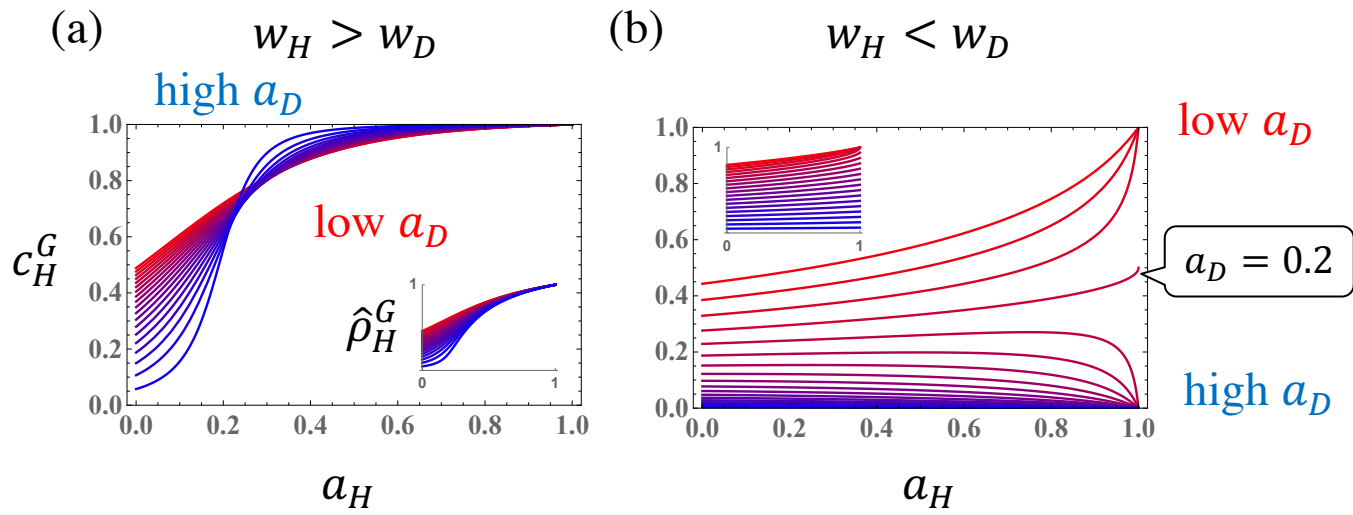



# Figure 3

(a)  $w_H > w_D$

(b)  $w_H < w_D$

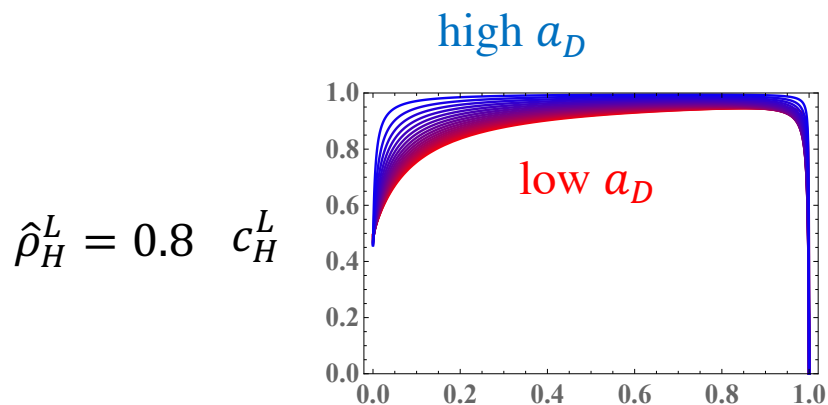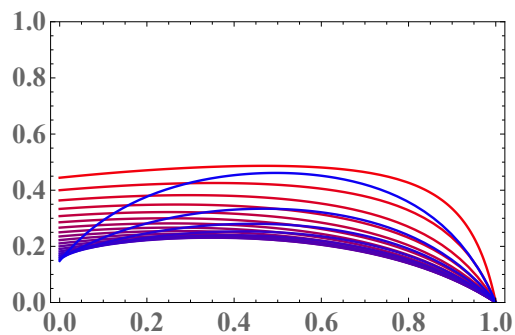

(c)

(d)

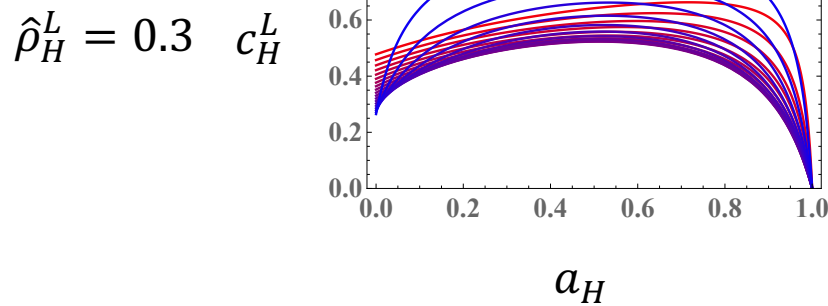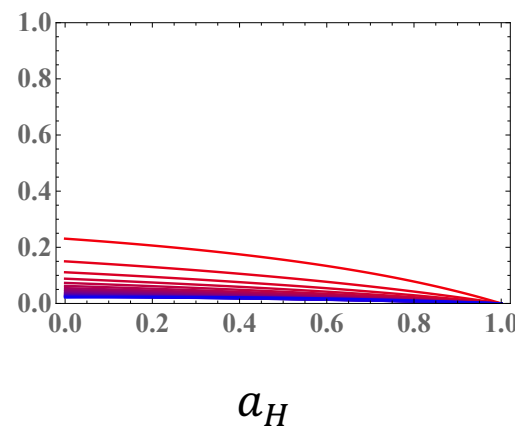

**Figure 4**

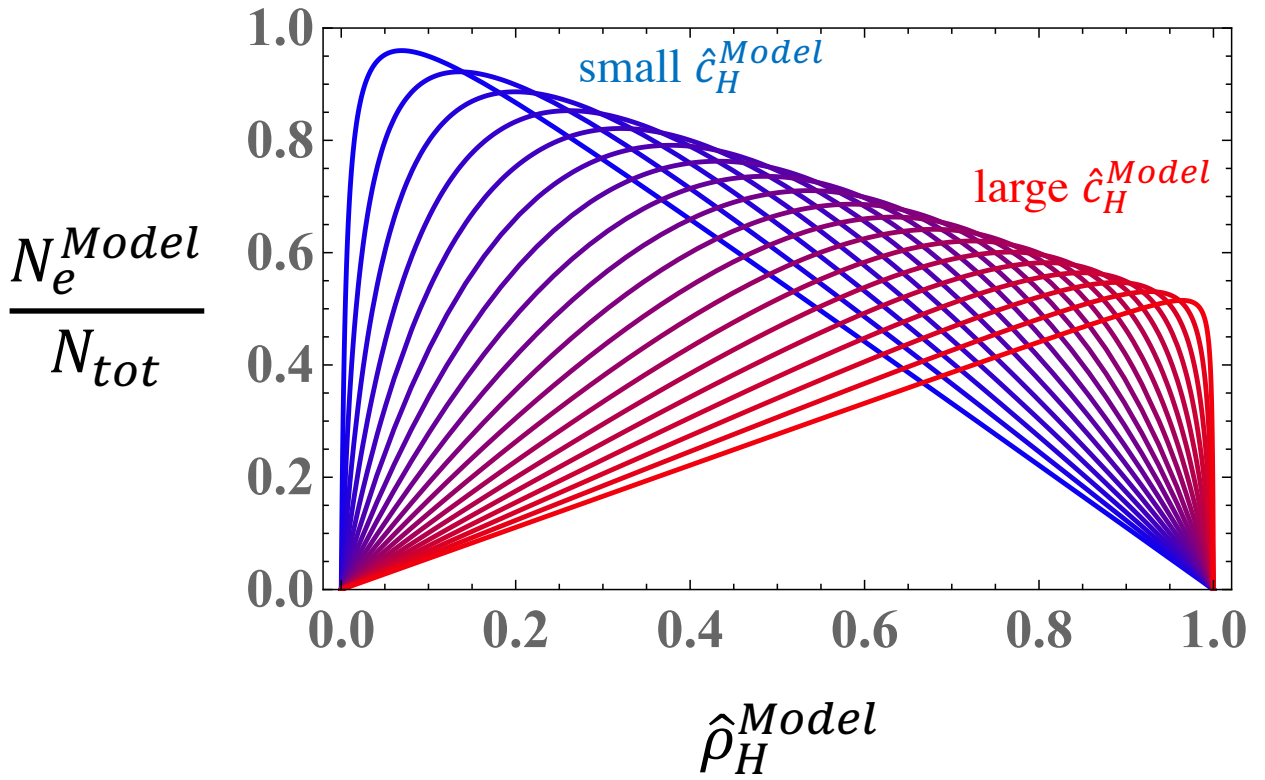

# Figure 5

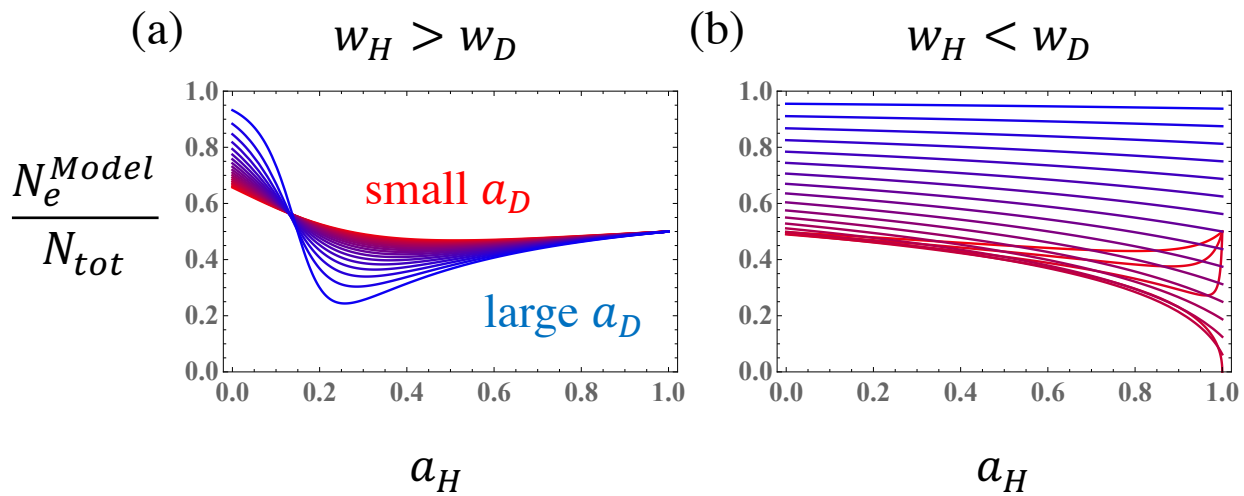

# Figure 6

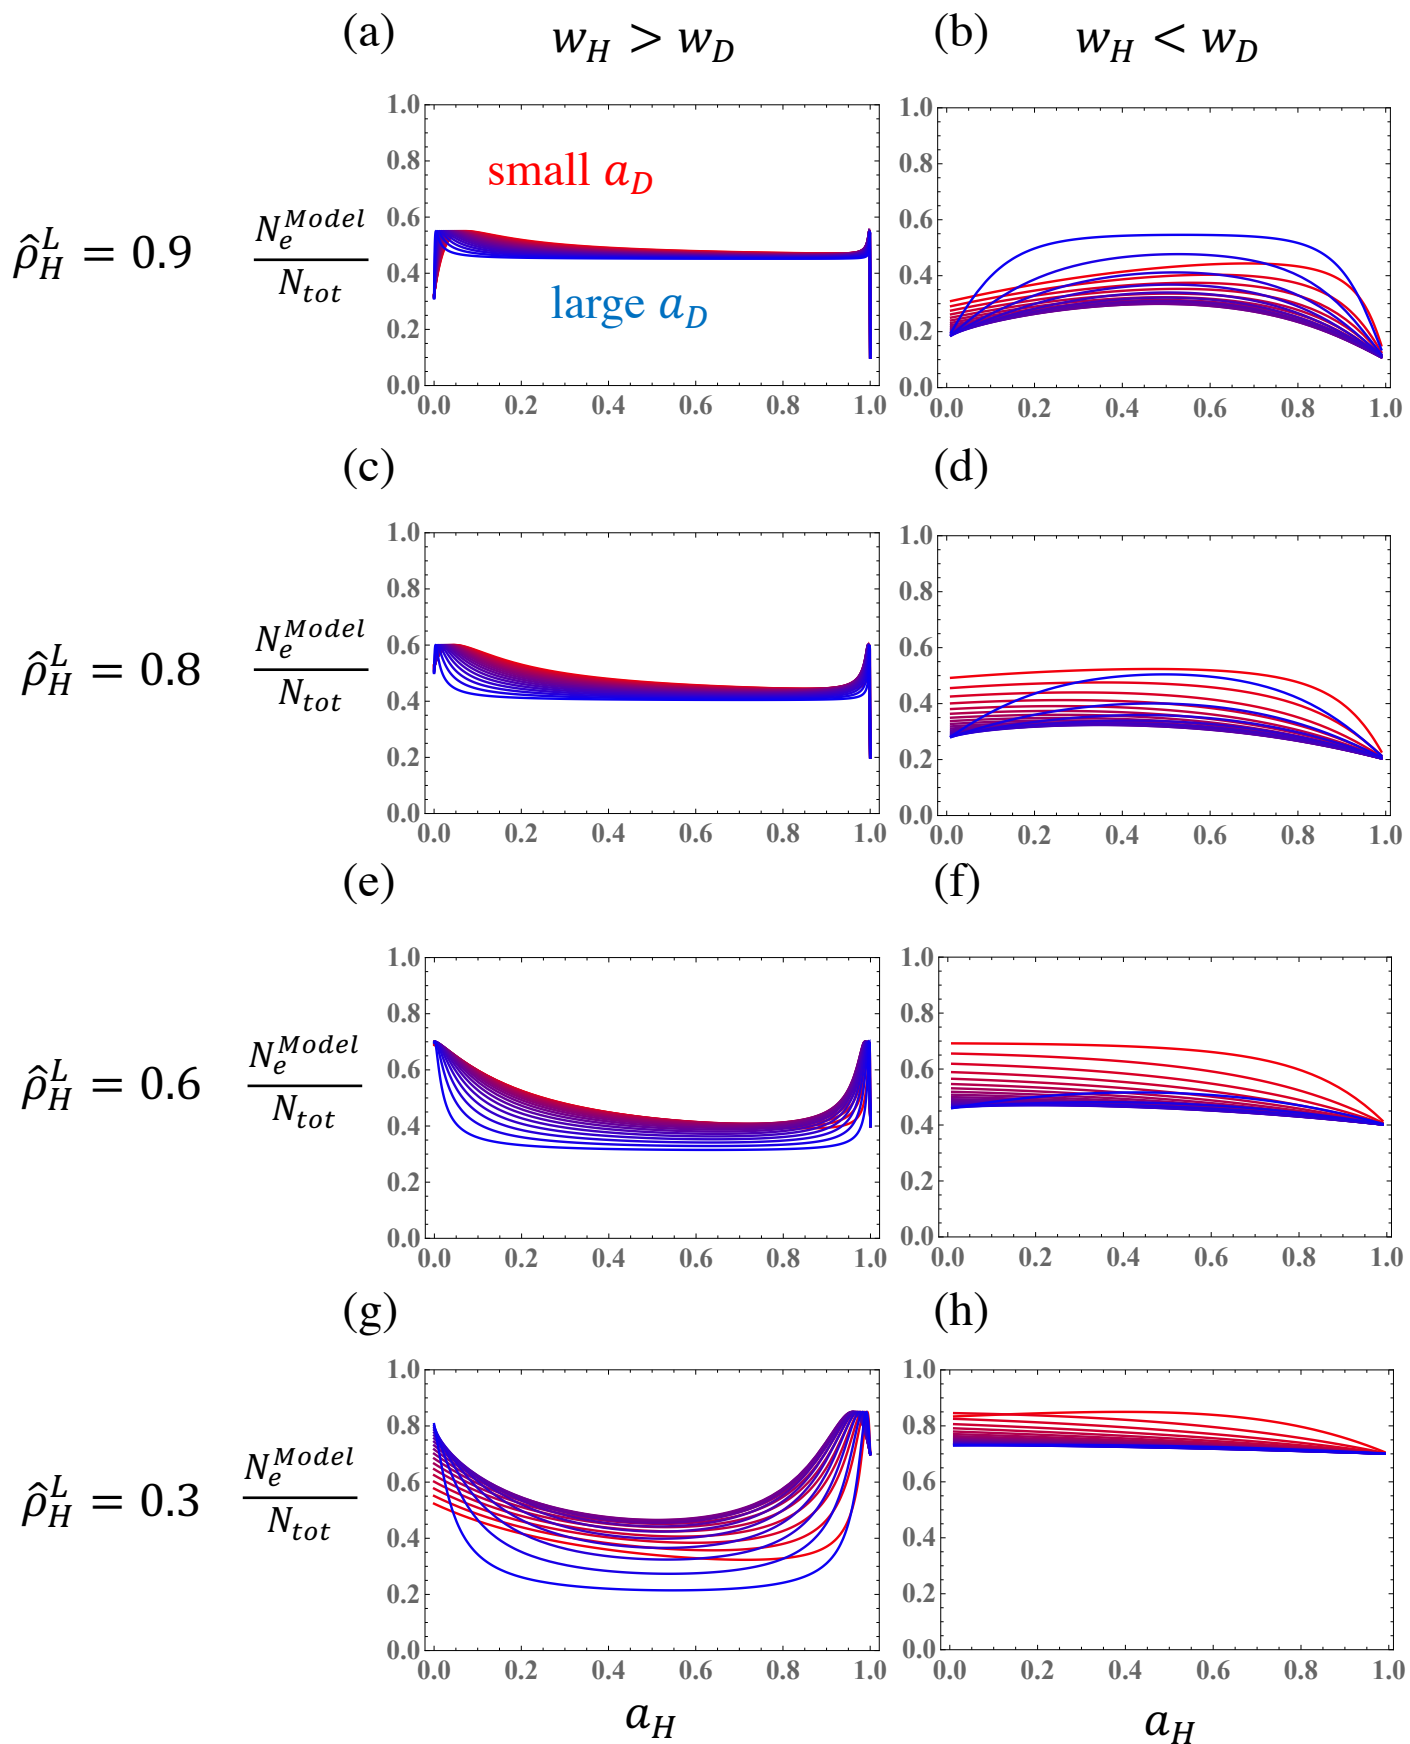

# Figure 7

(a) global regulation

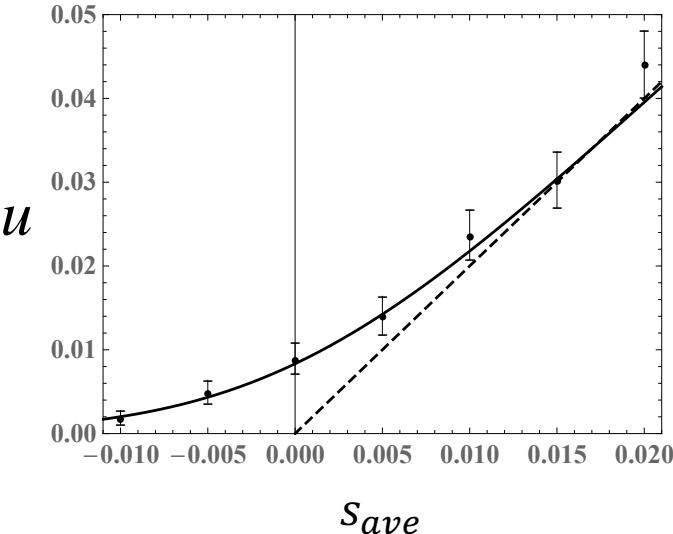

(b) local regulation

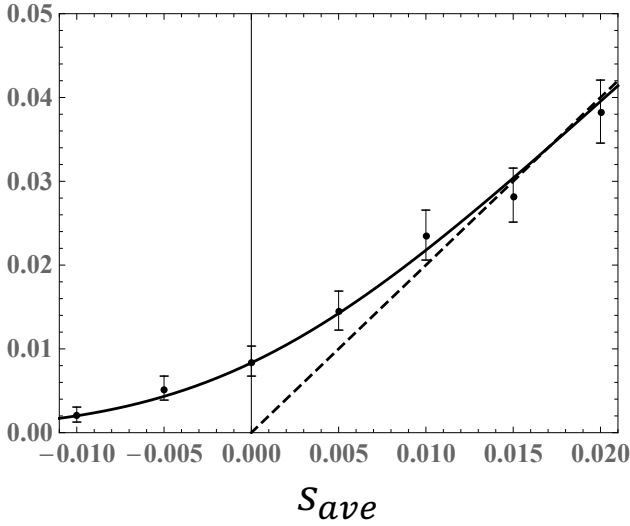

# Figure 8

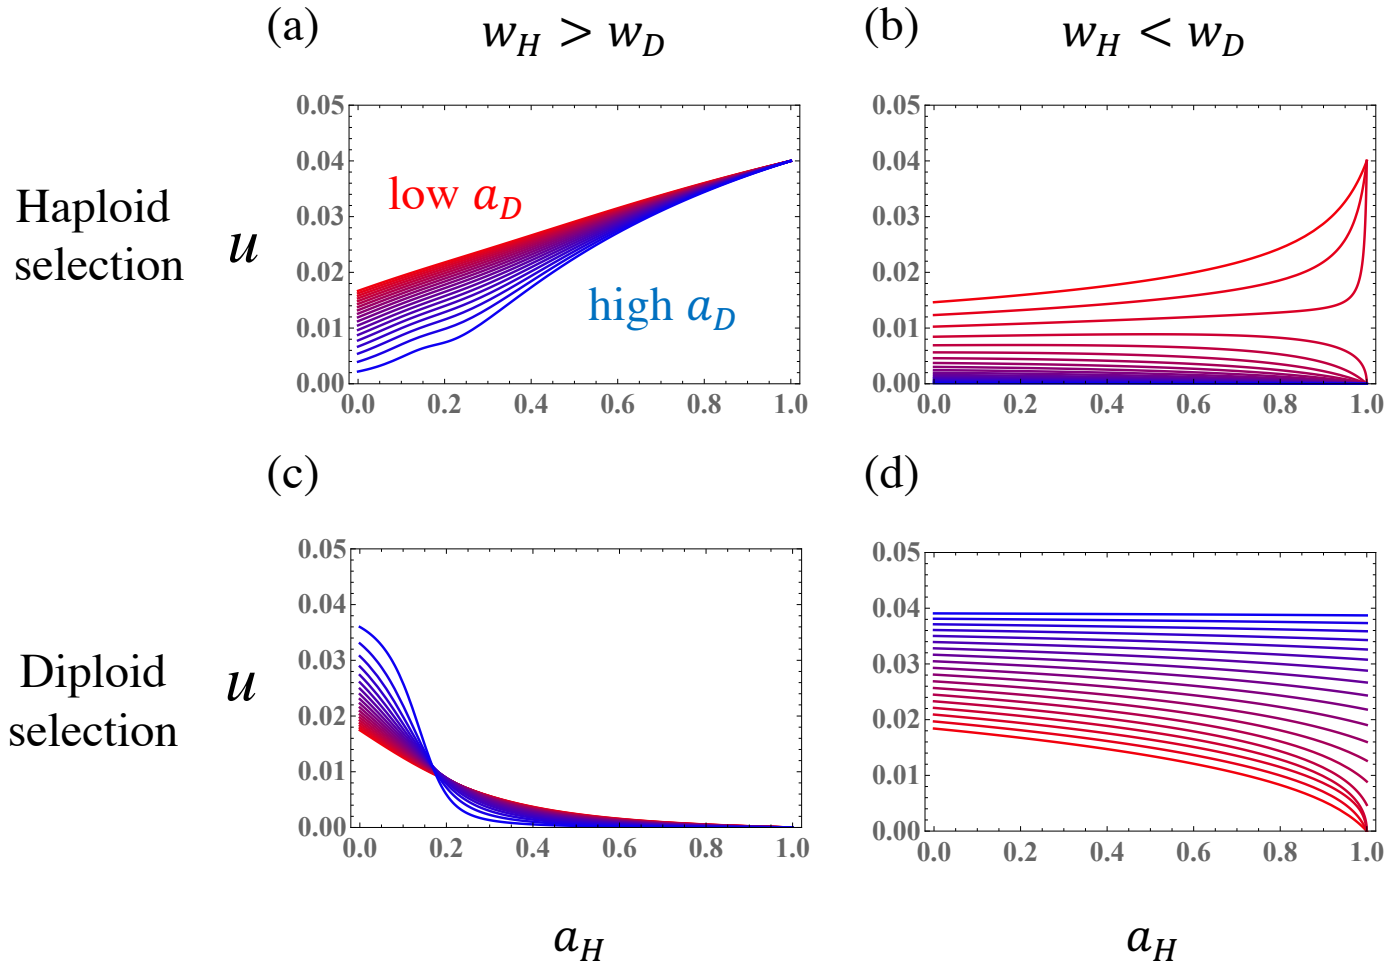

# Figure 9

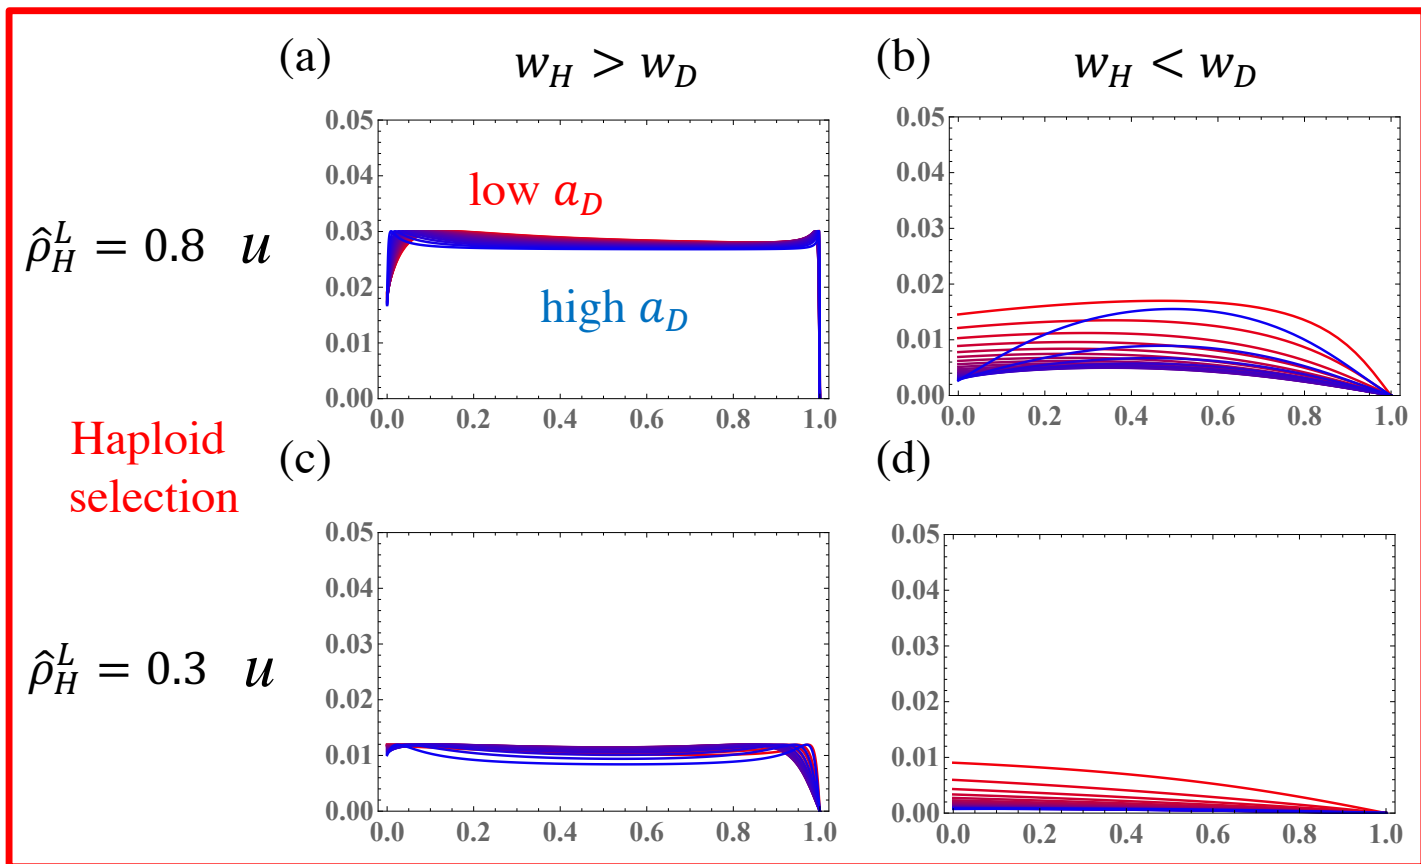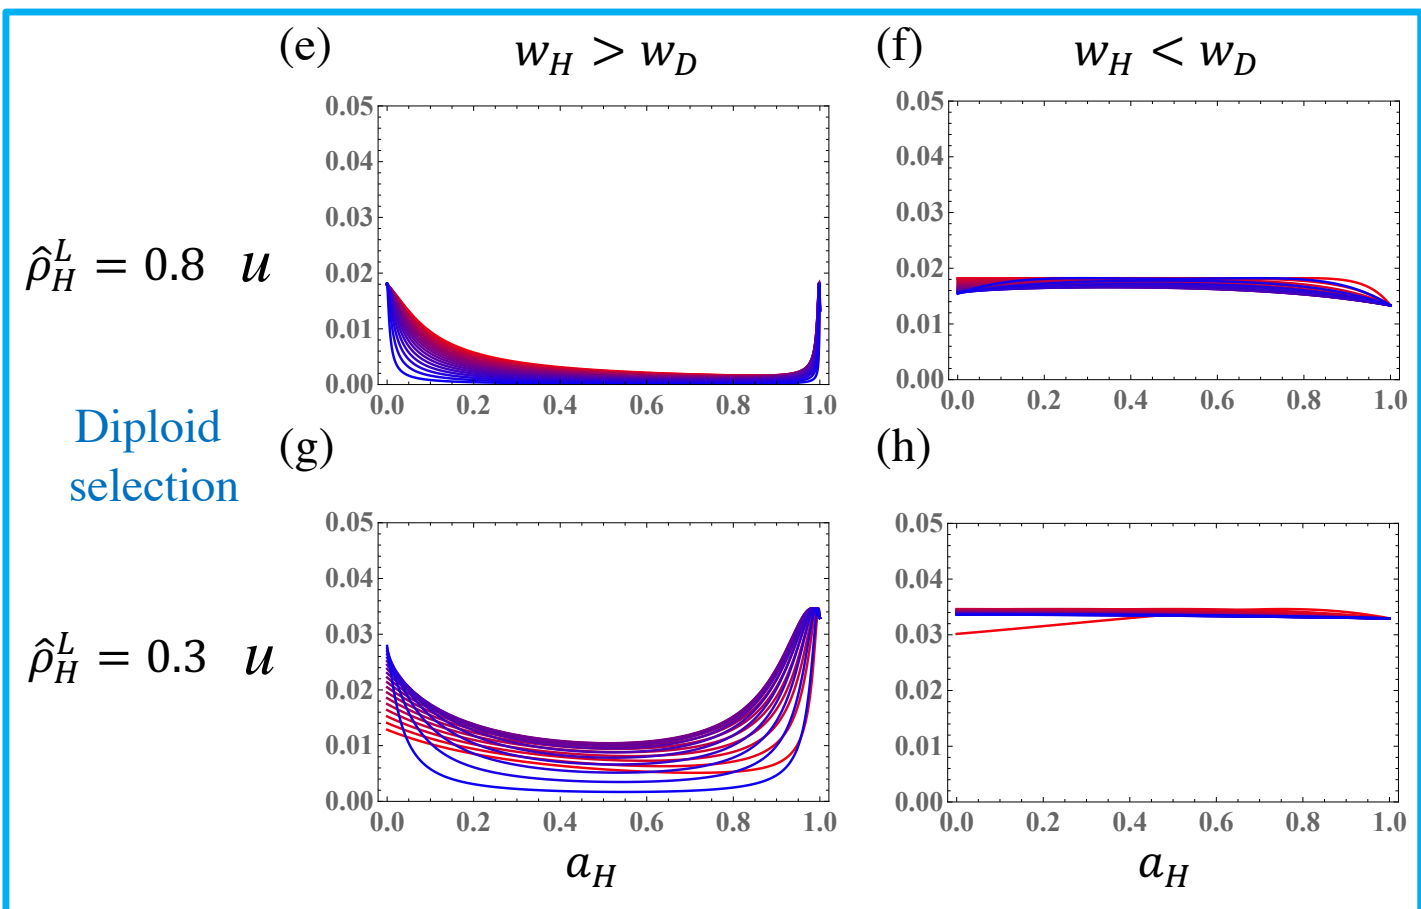

Source: https://www.biorxiv.org/content/10.1101/2020.09.17.295618v2.full.pdf
